# A Functional Ser326Cys Polymorphism in *hOGG1* Is Associated with Noise-Induced Hearing Loss in a Chinese Population

Huanxi Shen<sup>1,2,3</sup>, Jinglian Cao<sup>2,3,3</sup>, Zhiqiang Hong<sup>1,3</sup>, Kai Liu<sup>4</sup>, Jian Shi<sup>1</sup>, Lu Ding<sup>2,3</sup>, Hengdong Zhang<sup>3</sup>, Cheng Du<sup>1</sup>, Qian Li<sup>6</sup>, Zhengdong Zhang<sup>2,5\*</sup>, Baoli Zhu<sup>2,3\*</sup>

**1** Kunshan Municipal Center for Disease Prevention and Control, Kunshan, China, **2** Department of Environmental Genomics, Jiangsu Key Laboratory of Cancer Biomarkers, Prevention and Treatment, Cancer Center, Nanjing Medical University, Nanjing, China, **3** Institute of Occupational Disease Prevention, Jiangsu Provincial Center for Disease Prevention and Control, Nanjing, China, **4** Department of Disease Prevention and Control of Yizheng Hospital, Drum Tower Hospital Group of Nanjing, Yizheng, China, **5** Department of Genetic Toxicology, the Key Laboratory of Modern Toxicology of Ministry of Education, School of Public Health, Nanjing Medical University, Nanjing, China, **6** The First People's Hospital of Kunshan, Kunshan, China

## Abstract

DNA damage to cochlear hair cells caused by 8-oxoguanine (8-oxoG) is essential for the development of noise-induced hearing loss (NIHL). Human 8-oxoG DNA glycosylase1 (*hOGG1*) is a key enzyme in the base excision repair (BER) pathway that eliminates 8-oxoG. Many epidemiological and functional studies have suggested that the *hOGG1* Ser326Cys polymorphism (rs1052133) is associated with many diseases. The purpose of this investigation was to investigate whether the *hOGG1* Ser326Cys polymorphism in the human BER pathway is associated with genetic susceptibility to NIHL in a Chinese population. This polymorphism was genotyped among 612 workers with NIHL and 615 workers with normal hearing. We found that individuals with the *hOGG1* Cys/Cys genotype had a statistically significantly increased risk of NIHL compared with those who carried the *hOGG1* Ser/Ser genotype (adjusted OR = 1.59, 95% CI = 1.13–2.25) and this increased risk was more pronounced among the workers in the 15- to 25- and >25-year noise exposure time, 85–92 dB(A) noise exposure level, ever smoking, and ever drinking groups, similar effects were also observed in a recessive model. In summary, our data suggested that the *hOGG1* Cys/Cys genotype may be a genetic susceptibility marker for NIHL in the Chinese Han population.

**Citation:** Shen H, Cao J, Hong Z, Liu K, Shi J, et al. (2014) A Functional Ser326Cys Polymorphism in *hOGG1* Is Associated with Noise-Induced Hearing Loss in a Chinese Population. PLoS ONE 9(3): e89662. doi:10.1371/journal.pone.0089662

**Editor:** Giovanni Maga, Institute of Molecular Genetics IMG-CNR, Italy

**Received:** November 5, 2013; **Accepted:** January 22, 2014; **Published:** March 5, 2014

**Copyright:** © 2014 Shen et al. This is an open-access article distributed under the terms of the Creative Commons Attribution License, which permits unrestricted use, distribution, and reproduction in any medium, provided the original author and source are credited.

**Funding:** This study was mainly supported by Jiangsu Province's Outstanding Medical Academic Leader program (LJ201130), and was partly supported by Natural Science Foundation of Jiangsu Province (BK2010080), the Key Program for Basic Research of Jiangsu Provincial Department of Education (08KJA330001). The funders had no role in study design, data collection and analysis, decision to publish, or preparation of the manuscript.

**Competing Interests:** The authors have declared that no competing interests exist.

\* E-mail: zhubl@jscdc.cn (BZ); drdzhang@gmail.com (ZZ)

☞ These authors contributed equally to this work.

## Introduction

Noise-induced hearing loss (NIHL) is a common sensorineural impairment that is often caused by continuous and regular exposure to noise. NIHL is a leading occupational health risk in industrialised countries worldwide and the second most common form of sensorineural hearing impairment [1]. In the United States, 10 million people have noise-related hearing loss (<http://www.cdc.gov/NIOSH/>), and in China, the number of workers with NIHL has increased 77.8% in the last three years (2010–2012, <http://www.aqsc.cn>).

NIHL is a complex disease that is induced by a combination of environmental and genetic factors. It is well known that noise, chemicals such as organic solvents, ototoxic substances (e.g., aminoglycosides), heat, vibrations, smoking, and medical factors (increased blood pressure, cholesterol, and reduced iris pigmentation) are risk factors for NIHL [2,3]. To identify susceptible workers and to develop new therapies that prevent NIHL,

increasing new research is focused on an understanding of NIHL at the molecular level.

In the last 20 years, several animal studies have demonstrated that knockout mice, including *SOD*  $-/-$  [4], *GPX*  $-/-$  [5], *PMCA2*  $-/-$  [6], and *CDH23*  $+/-$  [7], have shown more sensitivity to noise than their wild-type littermates. These studies have suggested that deficits in genes that disrupt different pathways (e.g., oxidative stress and potassium recycling) and critical structures of the cochlea (e.g., stereocilia) contribute to an increase in the susceptibility of the inner ear to noise [1]. However, in humans, the discovery of susceptibility genes to NIHL has encountered many difficulties; no formal heritability studies have been performed to date. Furthermore, it is difficult to collect data from families or twins in which all subjects have been exposed to similar noise environments. However, association studies adopting a candidate gene approach have opened the door to discovering NIHL susceptibility genes [1]. Over the last 10 years, several studies have found that potassium-recycling pathway genes [8,9], monogenic deafness genes [10,11], Hsp70 genes [11,12], and

oxidative stress genes [13,14,15,16,17] have been associated with NIHL.

DNA damage to cochlear hair cells is essential for the development of NIHL, especially in the context of exposure to high noise levels [18]. The end result is cochlear hair death from a combination of necrosis and apoptosis. Correspondingly, several DNA repair pathways, including base excision repair (BER) [19,20,21], mismatch repair (MMR), nucleotide excision repair (NER), and DNA double-strain break repair [19], have evolved to maintain the genetic integrity of these cells and to prevent cell death. *Totonchy MB et al.* [22] also reported that DNA repair was important in the maintenance of hearing.

The 8-oxoguanine (8-oxoG) DNA lesion, caused by reactive oxygen species (ROS), is one of the most common forms of oxidative damage to DNA and leads to G: C to T: A transversions, causing carcinogenesis [23]. Human 8-oxoG DNA glycosylase 1 (*hOGG1*) is a key enzyme in the BER pathway that eliminates 8-oxoG [19,24].

Many epidemiological and functional studies have suggested that the Ser326Cys polymorphism (rs1052133) in exon 7 of *hOGG1* gene may affect the activity of *hOGG1* enzyme [25,26] and may therefore serve as a genetic marker for susceptibility to many diseases [27,28,29,30]; however, thus far, there have been no studies of association between the *hOGG1* Ser326Cys polymorphism and risk of NIHL.

To determine whether the *hOGG1* Ser326Cys polymorphism in the human BER pathway was associated with susceptibility to NIHL in the Chinese population, we genotyped 615 NIHL workers and 615 normal hearing workers and compared the genotype frequencies between these two groups.

## Materials and Methods

### 2.1 Subjects

This study included 615 NIHL workers and 615 normal hearing workers from the Datun Coal and Electricity Company (Xuzhou, China. 32 NIHL workers and 32 normal hearing workers were selected), Chenguang Machinery Manufacturing Group Corporation (Nanjing, China. 138 NIHL workers and 138 normal hearing workers were selected), and Yizheng Chemical Fiber Company Limited (Yizheng, China. 445 NIHL workers and 445 normal hearing workers were selected) between April 2010 and May 2011. All subjects (age range, 21–59 years) were Han Chinese. The detail population of information has been described in our previous study [16]. Briefly, these subjects had been continuously employed in these plants for at least one year, and all of them had their hearing tested once a year according to the Technical Specifications for Occupational Health Surveillance (2002) of China. We enrolled volunteers when workers exposed to occupational noise had their health examination; the inclusion criteria we used have been described in detail previously. In general, the selected workers had not been exposed commonly to chemical or physical factors associated with hearing loss (e.g., heat, vibrations, and organic solvents), had no record of military service, and had no medical factors or diseases that could affect hearing. The workers we selected did not regularly use hearing protection. The noise exposure time for each work was recorded according to their occupational health surveillance files which contained their exact noise exposure time. The subjects were recorded as ever smokers if they had smoked 100 cigarettes or more in their lifetimes. The subjects were recorded as ever drinkers if they had consumed three or more alcoholic drinks per week for at least one year [16]. This study protocol was approved by the institutional review board of

Nanjing Medical University, and written informed consent was obtained from all participants.

### 2.2 Questionnaire

The structured questionnaires were administered in face-to-face interviews conducted by our topic-based group for each subject. The information requested in the questionnaire included informed consent, demographic characteristics, lifestyle habits (smoking and alcohol consumption), history of ototoxic drug use, work history, noise exposure, physical and chemical factor exposure, hearing protection use, disease history, family history of deafness, and so on. All of the workers had been interviewed, and 1,230 useable questionnaires were collected.

### 2.3 Audiological status assessment and environmental noise measurement

As we have described in a previous study [16], an otolaryngologist conducted 500, 1,000, 2,000, 3,000, 4,000, and 6,000 pure-tone air hearing threshold tests in a sound-attenuating chamber with a background noise level of less than 25 dB(A). The workers were required to avoid a noisy environment for 12–48 h before they were tested. According to the Diagnostic Criteria of Occupational Noise-Induced Hearing Loss (Chinese Occupational Health Standard, GBZ49-2002, <http://www.zybw.net>) and the Technical Specifications for Occupational Health Surveillance, an ascending method in 5 dB(A) steps was adopted to ascertain the hearing threshold levels of both ears. The final threshold value for each ear was defined as the lowest signal intensity that a subject detected with a minimum of 3 trials. Hearing thresholds of less than 25 dB in both high- and low-frequency ranges were defined as normal. Correspondingly, hearing thresholds worse than 25 dB in the high-frequency range or in both high- and low-frequency ranges were defined as NIHL. However, in our study a high-frequency hearing threshold worse than 25 dB was recorded only because NIHL workers (35 workers) with both low- and high-frequency hearing worse than 25 dB were required to be removed from noisy environments according to the Diagnostic Criteria of Occupational Noise-Induced Hearing Loss (GBZ49-2002).

We used individual sound pressure noise meters (Noise-Pro, Quest, Oconomowoc WI, USA) to detect noise exposure levels in the workplace; they were worn by 1 to 10 workers in each workplace during the work shift, three times a year, as mandated by the China National Criteria for Noise in the Workplace. Additionally, the Noise-Pro was used at 10 AM, 3 PM, and 5 PM for three consecutive days at each workplace to test the noise exposure levels.

In the final analysis, the normal hearing workers (615 workers) were matched with the NIHL workers (615 workers) by age, sex, and similarity of occupational exposures (including noise exposure time, noise exposure level and so on). All subjects donated 2 ml venous blood samples for DNA extraction.

### 2.4 Genotyping of *hOGG1* Ser326Cys polymorphisms

Genomic DNA was isolated from the peripheral blood samples according to standard procedures using a TianGen DNA extraction kit (Beijing, China). The *hOGG1* Ser326Cys polymorphism was detected using the TaqMan SNP Genotyping assay and the 96-well ABI 7900HT Real Time PCR System (Applied Biosystems, Foster City, CA, USA). The primer sequences were 5'-CCTCCTACAGGTGCTGTTTCAGTG-3' and 5'-ACCCCTTCTGCGCTT-TGCT-3', and the probes were 5'-FAM-CCAATGCCGCCATG-MGB-3' and 5'-HEX-CGCCAATC-CGCCA-MGB-3', which were designed and manufactured by

Applied Biosystems Inc. (Foster City, CA, USA). The final volume for each reaction was 10  $\mu$ l, consisting of 2.5  $\mu$ l ddH<sub>2</sub>O, 5  $\mu$ l TaqMan Master Mix, 0.5  $\mu$ l F-prime, 0.5  $\mu$ l R-prime, 0.25  $\mu$ l FAM-probe, 0.25  $\mu$ l HEX-probe (Applied Biosystems Inc.), and 10 ng DNA. The PCR profile consisted of an initial denaturation step at 50°C for 2 min, 95°C for 10 min, and 40 cycles of 95°C for 15 s and 60°C for 1 min. The fluorescence level was detected using an ABI 7900HT Real-Time PCR System. The allele frequencies were determined using ABI SDS 2.3 software.

The genotypes of 3 NIHL workers could not be determined, although 3 attempts were made. Therefore, 612 NIHL workers and 615 normal hearing workers were analysed in total. Two persons independently performed the genotyping in a blinded fashion. More than 10% of the samples were randomly selected for confirmation, and the reproducibility was 100%.

## 2.5 Statistical analysis

All of the data were reorganised and entered with EpiData 3.1, and the statistical analysis was performed using SAS statistical software (version 9.1.3; SAS Institute, Cary, NC, USA).

Continuous data were analysed by independent-sample two-sided *t* tests. Categorical data were computed by two-sided  $\chi^2$  tests. Hardy-Weinberg equilibrium was tested by a goodness-of-fit  $\chi^2$  test. Multivariate logistic regressions were used to compute odds ratios (ORs) and 95% confidence intervals (95% CIs) to test the associations of different genotypes with noise susceptibility. Adjusted ORs and 95% CIs were computed by multivariate logistic regression adjusted for age, sex, smoking status, and drinking status. Furthermore, the stratification analyses were performed according to the subsections of noise exposure time, noise exposure level, smoking status, and drinking status, to estimate the different combinations of *hOGG1* genetic variants between NIHL workers and normal hearing workers. Multivariate logistic regressions were also used to analyze gene-environment interactions. All of the tests were two-sided, and a *P*-value <0.05 was considered statistically significant.

## Results

### 3.1 Subject characteristics

The demographic and occupational characteristics of 612 NIHL workers and 615 normal hearing workers are shown in Table 1. Overall, there were no significant differences in the distribution of age, sex, smoking status, drinking status, exposure level, or exposure time between the NIHL and normal hearing workers. We did observe that the average threshold value of the NIHL workers was over two times greater than that of the normal hearing workers [37.2 dB(A) *vs.* 14.1 dB(A)]. The majority of the smokers and drinkers in our cohort were light smokers and light drinkers (the average was 4.8 cigarettes per day and 8.5 g of alcohol per day separately); we did not analyse the effects of smoking and drinking quantitatively.

### 3.2 Associations of the *hOGG1* polymorphisms with the susceptibility to NIHL

The observed genotypes and allele frequencies of *hOGG1* among the NIHL workers and normal hearing workers and their associations with the risk of NIHL are presented in Table 2. The allele frequency of *hOGG1* Ser326Cys among the normal hearing workers was consistent with Hardy-Weinberg equilibrium (*P* = 0.223). The frequency of the *hOGG1* Cys/Cys genotype in the normal hearing workers (12.7%), which is similar to that reported in a previous study in a Chinese population (the frequency of *hOGG1* Cys/Cys genotype is 13.4%) [31], was statistically lower

than the frequency in the NIHL workers (17.9%, *P* = 0.008). Multivariate logistic regression analyses also revealed that individuals with the *hOGG1* Cys/Cys genotype had a 1.59-fold risk of NIHL compared with individuals carrying a Ser/Ser genotype (adjusted OR = 1.59, 95% CI = 1.13–2.25). When we combined the Ser/Ser and Ser/Cys genotypes as a reference to conduct a recessive model, the number of workers with the Cys/Cys genotype was greater among the NIHL group than in the normal hearing worker group (17.9% *vs.* 12.7%, *P* = 0.010); workers who carried the Cys/Cys genotype had a higher risk of NIHL (1.52, 1.11–2.08). We also found that there were more Cys allele individuals among the NIHL workers than among the normal hearing workers (41.9% *vs.* 37.2%, *P* = 0.017). The multivariate logistic regression analysis revealed that the workers with the Cys allele had a higher risk of NIHL than the normal hearing workers (OR = 1.22, 95% CI = 1.04–1.43).

### 3.3 Stratification analysis between the *hOGG1* polymorphism and risk of NIHL

The results of the stratification analysis are presented in Tables 3 and Table 4. In Table 3, we found that the individuals with the *hOGG1* Cys/Cys genotype were more susceptible to NIHL than those who carrying the *hOGG1* Ser/Ser genotype, both in the 15- to 25-year noise exposure group (adjusted OR = 1.67, 95% CI = 1.02–2.72) and in the >25-year noise exposure group (2.71, 1.16–6.36). Similar effects were also noted for smoking and drinking status; ever smoking or ever drinking subjects with the *hOGG1* Cys/Cys genotype were more susceptible to NIHL. But in the stratification of noise exposure level, we only found that the *hOGG1* Cys/Cys genotype carriers with 85 to 92 dB(A) exposure levels were at a significantly increased risk of NIHL (3.34, 1.59–7.02); no effects were observed in either the <85 dB(A) or >92 dB(A) noise-exposure levels.

A stratification analysis between the *hOGG1* recessive model and risk of NIHL is shown in Table 4. The subjects with the *hOGG1* Cys/Cys genotype had an increased risk of NIHL in the >25-year group (adjusted OR = 2.48, 95% CI = 1.20–5.14), the 85 to 92 dB(A) noise exposure level group (2.83, 1.46–5.49), the ever smoking group (1.68, 1.04–2.70), and the ever drinking group (1.78, 1.18–2.68).

Gene-environment interactions were also analyzed between the *hOGG1* Cys/Cys genotype and NIHL risk factors (noise exposure time, noise exposure level, smoking and drinking), but no gene-environment interactions were found in this study (*P* > 0.05).

## Discussion

In this case-control study, we found that the *hOGG1* Cys/Cys genotype was statistically significantly associated with NIHL. Moreover, the synergistic effects of the *hOGG1* Ser326Cys polymorphism and noise exposure time, noise exposure level, smoking status, and drinking status on NIHL were observed in our study.

Several studies have reported that the *hOGG1* Ser326Cys polymorphism was associated with risk of cancers and various metabolic disorders [21,29,30,32]. However, there have been no studies published exploring the *hOGG1* Ser326Cys polymorphism and NIHL risk among noise exposure subjects. To the best of our knowledge, this study is the first to investigate the association between the *hOGG1* Ser326Cys polymorphism and NIHL risk in a Chinese population.

Caused by ROS, 8-oxoG in DNA is a major form of oxidative damage, which may lead to mutagenesis or carcinogenesis [23] and which can be repaired by the BER pathway. The *hOGG1*

**Table 1.** Demographic and occupational characteristics of the NIHL and normal hearing workers.

| Variables              | NIHL workers (n = 612) |      | Normal hearing workers (n = 615) |      | <i>p</i> <sup>a</sup> |
|------------------------|------------------------|------|----------------------------------|------|-----------------------|
|                        | N                      | %    | N                                | %    |                       |
| Age (years)            | 40.4±6.3               |      | 40.4±5.9                         |      | 0.979 <sup>b</sup>    |
| <35                    | 122                    | 19.9 | 120                              | 19.5 | 0.963                 |
| 35–45                  | 368                    | 60.2 | 369                              | 60.0 |                       |
| >45                    | 122                    | 19.9 | 126                              | 20.5 |                       |
| Sex                    |                        |      |                                  |      |                       |
| Male                   | 565                    | 92.3 | 564                              | 91.7 | 0.692                 |
| Female                 | 47                     | 7.7  | 51                               | 8.3  |                       |
| Smoking status         |                        |      |                                  |      |                       |
| Never                  | 366                    | 59.8 | 359                              | 58.4 | 0.611                 |
| Ever                   | 246                    | 40.2 | 256                              | 41.6 |                       |
| Drinking status        |                        |      |                                  |      |                       |
| Never                  | 259                    | 42.3 | 256                              | 41.6 | 0.805                 |
| Ever                   | 353                    | 57.7 | 359                              | 58.4 |                       |
| Exposure level [dB(A)] | 87.1±7.7               |      | 87.0±7.6                         |      | 0.804 <sup>b</sup>    |
| <85                    | 234                    | 38.2 | 246                              | 40.0 | 0.735                 |
| 85–92                  | 161                    | 26.3 | 151                              | 24.5 |                       |
| >92                    | 217                    | 35.5 | 218                              | 35.5 |                       |
| Exposure time (years)  | 18.6±7.6               |      | 18.2±7.4                         |      | 0.403 <sup>b</sup>    |
| <15                    | 189                    | 30.9 | 194                              | 31.5 | 0.645                 |
| 15–25                  | 308                    | 50.3 | 318                              | 51.7 |                       |
| >25                    | 115                    | 18.8 | 103                              | 16.8 |                       |
| Threshold [dB]         | 37.2±11.9              |      | 14.1±4.1                         |      | <0.001 <sup>b</sup>   |

<sup>a</sup>Two-sided  $\chi^2$  test was used for comparing the frequency distribution.

<sup>b</sup>Two-sided *t*-test was used for comparing the mean values of the continuous variables.

doi:10.1371/journal.pone.0089662.t001

enzyme in the BER pathway, which is encoded by the *hOGG1* gene on chromosome 3p26, recognises the 8-oxoG lesions and catalyses the cleavage of the glycosidic bond between the modified base and sugar moiety, leaving an abasic, apurinic/aprimidinic site (AP-site) in DNA, and the AP-endonuclease-1 (APEX/APE1) enzyme then acts upon it [19]. Multiple functional studies have revealed that the glycosylase activity of the Cys326 variant of the *hOGG1* enzyme (Cys326-*hOGG1* enzyme) is more sensitive to inactivation

by oxidising agents compared with the Ser326-*hOGG1* enzyme [25,33]. The activity for the repair of 8-oxoG was approximately 7-fold greater in the *hOGG1*-Ser326 protein than in the *hOGG1*-Cys326 protein in a complementation assay of an *E. coli* mutant defective in the repair of 8-oxoG [34]. Our study also found there were more individuals with the *hOGG1* Cys/Cys genotype among NIHL workers than among normal hearing workers, suggesting that subjects carrying the *hOGG1* Cys/Cys genotype may have

**Table 2.** Association of the *hOGG1* Ser326Cys polymorphism with the risk of NIHL.

| Genotypes       | NIHL workers (n = 612) |      | Normal hearing workers (n = 615) |      | OR (95% CI)             | Adjusted <sup>a</sup> OR (95% CI) | <i>p</i> <sup>b</sup> |
|-----------------|------------------------|------|----------------------------------|------|-------------------------|-----------------------------------|-----------------------|
|                 | N                      | %    | N                                | %    |                         |                                   |                       |
| Ser/Ser         | 209                    | 34.2 | 236                              | 38.4 | 1.00 (reference)        | 1.00 (reference)                  |                       |
| Ser/Cys         | 293                    | 47.9 | 301                              | 48.9 | 1.10 (0.86–1.41)        | 1.09 (0.86–1.40)                  | 0.451                 |
| Cys/Cys         | 110                    | 17.9 | 78                               | 12.7 | <b>1.59 (1.13–2.25)</b> | <b>1.59 (1.13–2.25)</b>           | <b>0.008</b>          |
| Ser/Ser+Ser/Cys | 502                    | 82.1 | 537                              | 87.3 | 1.00 (reference)        | 1.00 (reference)                  |                       |
| Cys/Cys         | 110                    | 17.9 | 78                               | 12.7 | <b>1.51 (1.10–2.07)</b> | <b>1.52 (1.11–2.08)</b>           | <b>0.010</b>          |
| Ser allele      | 711                    | 58.1 | 773                              | 62.8 | 1.00                    |                                   |                       |
| Cys allele      | 513                    | 41.9 | 457                              | 37.2 | <b>1.22 (1.04–1.43)</b> |                                   | <b>0.017</b>          |

<sup>a</sup>Adjusted for age, sex, smoking, and drinking status.

<sup>b</sup>Two-sided  $\chi^2$  test for the frequency distributions of selected variables between the hearing loss workers and normal hearing workers.

doi:10.1371/journal.pone.0089662.t002

**Table 3.** Stratified analysis of the *hOGG1* Ser326Cys polymorphism (Cys/Cys vs. Ser/Ser genotype) associated with NIHL risk.

| Variables              | NIHL workers      |                   | Normal hearing workers |                  | OR (95% CI)             | Adjusted OR (95% CI) <sup>a</sup> | p <sup>b</sup>     |
|------------------------|-------------------|-------------------|------------------------|------------------|-------------------------|-----------------------------------|--------------------|
|                        | Ser/Ser (n = 209) | Cys/Cys (n = 110) | Ser/Ser (n = 236)      | Cys/Cys (n = 78) |                         |                                   |                    |
|                        | N (%)             | N (%)             | N (%)                  | N (%)            |                         |                                   |                    |
| Exposure time (years)  |                   |                   |                        |                  |                         |                                   | 0.130 <sup>c</sup> |
| <15                    | 69 (36.3)         | 27 (14.2)         | 69 (36.3)              | 25 (14.2)        | 1.08 (0.57–2.04)        | 1.09 (0.57–2.07)                  | 0.813              |
| 15–25                  | 103 (31.7)        | 53 (16.3)         | 129 (39.7)             | 40 (12.3)        | <b>1.66 (1.02–2.70)</b> | <b>1.67 (1.02–2.72)</b>           | <b>0.040</b>       |
| >25                    | 37 (31.4)         | 30 (25.4)         | 38 (32.2)              | 13 (11.0)        | <b>2.37 (1.07–5.24)</b> | <b>2.71 (1.16–6.36)</b>           | <b>0.031</b>       |
| Exposure level [dB(A)] |                   |                   |                        |                  |                         |                                   | 0.363 <sup>c</sup> |
| <85                    | 84 (31.9)         | 47 (17.9)         | 97 (36.9)              | 35 (13.3)        | 1.55 (0.92–2.62)        | 1.53 (0.89–2.62)                  | 0.101              |
| 85–92                  | 51 (30.7)         | 36 (21.7)         | 64 (38.6)              | 15 (9.0)         | <b>3.01 (1.49–6.10)</b> | <b>3.34 (1.59–7.02)</b>           | <b>0.002</b>       |
| >92                    | 74 (36.3)         | 27 (13.2)         | 75 (36.8)              | 28 (13.7)        | 0.98 (0.53–1.81)        | 0.98 (0.53–1.82)                  | 0.942              |
| Smoking status         |                   |                   |                        |                  |                         |                                   | 0.731 <sup>c</sup> |
| Never                  | 128 (34.2)        | 60 (16.0)         | 142 (38.0)             | 44 (11.8)        | 1.51 (0.96–2.39)        | 1.51 (0.96–2.39)                  | 0.075              |
| Ever                   | 81 (31.3)         | 50 (19.3)         | 94 (36.3)              | 34 (13.1)        | <b>1.71 (1.01–2.89)</b> | <b>1.73 (1.02–2.95)</b>           | <b>0.046</b>       |
| Drinking status        |                   |                   |                        |                  |                         |                                   | 0.318 <sup>c</sup> |
| Never                  | 88 (34.0)         | 40 (15.4)         | 97 (37.5)              | 34 (13.1)        | 1.30 (0.76–2.23)        | 1.33 (0.77–2.29)                  | 0.346              |
| Ever                   | 121 (32.3)        | 70 (18.7)         | 139 (37.2)             | 44 (11.8)        | <b>1.83 (1.17–2.86)</b> | <b>1.82 (1.16–2.86)</b>           | <b>0.008</b>       |

<sup>a</sup>Adjusted for age, sex, smoking, and drinking.

<sup>b</sup>Two-sided  $\chi^2$  test for the frequency distributions of the selected variables between the NIHL workers and normal hearing workers.

<sup>c</sup>Gene-environment interaction *P* values for the *hOGG1* Ser326Cys polymorphism and NIHL risk factors.

doi:10.1371/journal.pone.0089662.t003

**Table 4.** Stratified analysis of the *hOGG1* Ser326Cys polymorphism (Cys/Cys vs. Ser/Ser+Ser/Cys genotype) associated with NIHL risk.

| Variables              | NIHL workers              |                   | Normal hearing workers    |                  | OR (95% CI)             | Adjusted OR (95% CI) <sup>a</sup> | p <sup>b</sup>     |
|------------------------|---------------------------|-------------------|---------------------------|------------------|-------------------------|-----------------------------------|--------------------|
|                        | Ser/Ser+Ser/Cys (n = 502) | Cys/Cys (n = 110) | Ser/Ser+Ser/Cys (n = 537) | Cys/Cys (n = 78) |                         |                                   |                    |
|                        | N (%)                     | N (%)             | N (%)                     | N (%)            |                         |                                   |                    |
| Exposure time (years)  |                           |                   |                           |                  |                         |                                   | 0.072 <sup>c</sup> |
| <15                    | 162 (42.3)                | 27 (7.1)          | 169 (44.1)                | 25 (6.5)         | 1.13 (0.63–2.02)        | 1.15 (0.64–2.08)                  | 0.689              |
| 15–25                  | 255 (40.7)                | 53 (8.5)          | 278 (44.4)                | 40 (6.4)         | 1.45 (0.93–2.25)        | 1.47 (0.94–2.29)                  | 0.104              |
| >25                    | 85 (39.0)                 | 30 (13.8)         | 90 (41.3)                 | 13 (5.9)         | <b>2.44 (1.20–4.99)</b> | <b>2.48 (1.20–5.14)</b>           | <b>0.013</b>       |
| Exposure level [dB(A)] |                           |                   |                           |                  |                         |                                   | 0.415 <sup>c</sup> |
| <85                    | 187 (39.0)                | 47 (9.8)          | 211 (44.0)                | 35 (7.2)         | 1.52 (0.94–2.45)        | 1.50 (0.93–2.43)                  | 0.088              |
| 85–92                  | 125 (40.1)                | 36 (11.5)         | 136 (43.6)                | 15 (4.8)         | <b>2.61 (1.36–5.00)</b> | <b>2.83 (1.46–5.49)</b>           | <b>0.003</b>       |
| >92                    | 190 (43.7)                | 27 (6.2)          | 190 (43.7)                | 28 (6.4)         | 0.96 (0.55–1.70)        | 0.95 (0.54–1.68)                  | 0.900              |
| Smoking status         |                           |                   |                           |                  |                         |                                   | 0.593 <sup>c</sup> |
| Never                  | 306 (42.2)                | 60 (8.3)          | 315 (43.5)                | 44 (6.1)         | 1.40 (0.92–2.14)        | 1.42 (0.93–2.16)                  | 0.112              |
| Ever                   | 196 (39.0)                | 50 (10.0)         | 222 (44.2)                | 34 (6.8)         | <b>1.67 (1.04–2.68)</b> | <b>1.68 (1.04–2.70)</b>           | <b>0.035</b>       |
| Drinking status        |                           |                   |                           |                  |                         |                                   | 0.231 <sup>c</sup> |
| Never                  | 219 (42.5)                | 40 (7.8)          | 222 (43.1)                | 34 (6.6)         | 1.19 (0.73–1.95)        | 1.21 (0.74–1.99)                  | 0.484              |
| Ever                   | 283 (39.8)                | 70 (9.8)          | 315 (44.2)                | 44 (6.2)         | <b>1.77 (1.18–2.67)</b> | <b>1.78 (1.18–2.68)</b>           | <b>0.006</b>       |

<sup>a</sup>Adjusted for age, sex, smoking, and drinking.

<sup>b</sup>Two-sided  $\chi^2$  test for the frequency distributions of selected variables between the NIHL workers and normal hearing workers.

<sup>c</sup>Gene-environment interaction *P* values for the *hOGG1* Ser326Cys polymorphism and NIHL risk factors.

doi:10.1371/journal.pone.0089662.t004

lower activity for repairing 8-oxoG damage, thereby increasing the risk of NIHL.

Notably, when the noise exposure time was combined with the *hOGG1* Cys/Cys genotype, the effects were more significant. NIHL is positively correlated with noise exposure time; when workers are exposed to noise for a longer time, the cumulative noise exposure (CNE) is greater, and they are more susceptible to NIHL [3]. Moreover, many workers with longer noise exposure times are older and may be influenced by age-related hearing impairment (ARHI). A previous study has also reported that there is a significantly age-associated decrease in DNA repair capacity [35].

Noise exposure levels are important for the activation of the antioxidant system. In chinchillas, *Jacano AA* [36] observed no increase in the antioxidant system after a conditioning noise exposure of 90 dB SPL (0.5 kHz, 6 h per day for 6 days), but a large increase in the antioxidant system in response to 105 dB SPL (0.5 kHz, 4 h). Positively induced by ROS, 8-oxoG is correlated with noise exposure level and also has a positive correlation with the expression of DNA repair enzymes [37]. NIHL is a progressive, cumulative disease; most workers in the >92 dB(A) noise exposure group were often transferred to a no-noise exposure position after working for a few years, as we described previously [16]. The subjects in the <85 dB(A) and >92 dB(A) groups had low cumulative noise exposures, while individuals in the 85 to 92 dB(A) group were assumed to have had sufficient cumulative noise exposure.

Smoking may accelerate NIHL; some studies have reported the adverse effects of smoking on hearing [38,39]. However, a few studies have not identified any associations between smoking and hearing loss [40]. Our study showed that smoking was associated with NIHL. Workers with the *hOGG1* Cys/Cys genotype had a 1.68-fold increased risk of NIHL than workers who carried the *hOGG1* Ser/Ser genotype among ever smokers. The effect was less pronounced when all subjects were included in the analysis (adjusted OR = 1.59, less than 1.68). In the recessive model, a similar phenomenon was also observed. A possible explanation for

the underlying pathogenic mechanism may be the well-known vascular changes and the consequent cochlear hypoxia related to both smoking and noise exposure. Adverse effects were also observed between drinking and NIHL in this study, which was consistent with previous studies [41,42]. However, some studies have reported that drinking alcohol may not either influence hearing or be a protective factor [43,44]; more study is required to confirm this possibility.

Compared with other studies, ours was the first to investigate the association between the functional *hOGG1* Ser326Cys polymorphism and NIHL risk. Moreover, thousands of workers who had been exposed to steady noise for up to 20 years or more but who were less exposed to other occupational hazards were enrolled in our study. Furthermore, all of our NIHL workers were in an early stage of NIHL according to GBZ49-2002; additionally, individual noise meters were used to assess the noise environment so that the results would reflect real exposure levels. One limitation of this study was that the NIHL workers with both low- and high-frequency hearing ranges worse than 25 dB were all transferred from noisy environments; therefore, selection bias may exist in our study.

In conclusion, our data suggested that the *hOGG1* Cys/Cys genotype may be a genetic susceptibility marker for NIHL in the Han Chinese population, especially in the 15- to 25-year and >25-year noise exposure time, 85 to 92 dB(A) noise exposure level, ever smoking, and ever drinking groups. To confirm our findings, further case-control or cohort studies with more subjects (enrolling all NIHL workers) and *in vivo* functional evaluations are needed in the future.

## Author Contributions

Conceived and designed the experiments: BZ ZZ. Performed the experiments: HS JC LD. Analyzed the data: HS ZH. Contributed reagents/materials/analysis tools: KL JS HZ CD QL. Wrote the paper: HS.

## References

1. Sliwiska-Kowalska M, Pawelczyk M (2013) Contribution of genetic factors to noise-induced hearing loss: a human studies review. *Mutat Res* 752: 61–65.
2. Sliwiska-Kowalska M, Zmyslowska-Szymtyke E, Szymczak W, Kotylo P, Fiszler M, et al. (2004) Effects of coexposure to noise and mixture of organic solvents on hearing in dockyard workers. *J Occup Environ Med* 46: 30–38.
3. Konings A, Van Laer L, Van Camp G (2009) Genetic studies on noise-induced hearing loss: a review. *Ear Hear* 30: 151–159.
4. Ohlemiller KK, McFadden SL, Ding DL, Flood DG, Reaume AG, et al. (1999) Targeted deletion of the cytosolic Cu/Zn-superoxide dismutase gene (*Sod1*) increases susceptibility to noise-induced hearing loss. *Audiol Neurootol* 4: 237–246.
5. Ohlemiller KK, McFadden SL, Ding DL, Lear PM, Ho YS (2000) Targeted mutation of the gene for cellular glutathione peroxidase (*Gpx1*) increases noise-induced hearing loss in mice. *J Assoc Res Otolaryngol* 1: 243–254.
6. Kozel PJ, Davis RR, Krieg EF, Shull GE, Erway LC (2002) Deficiency in plasma membrane calcium ATPase isoform 2 increases susceptibility to noise-induced hearing loss in mice. *Hear Res* 164: 231–239.
7. Holme RH, Steel KP (2004) Progressive hearing loss and increased susceptibility to noise-induced hearing loss in mice carrying a *Cdh23* but not a *Myo7a* mutation. *J Assoc Res Otolaryngol* 5: 66–79.
8. Van Laer L, Carlsson PI, Ottschytch N, Bondeson ML, Konings A, et al. (2006) The contribution of genes involved in potassium-recycling in the inner ear to noise-induced hearing loss. *Hum Mutat* 27: 786–795.
9. Pawelczyk M, Van Laer L, Franssen E, Rajkowska E, Konings A, et al. (2009) Analysis of gene polymorphisms associated with K ion circulation in the inner ear of patients susceptible and resistant to noise-induced hearing loss. *Ann Hum Genet* 73: 411–421.
10. Konings A, Van Laer L, Wiktorowicz Smagur A, Rajkowska E, Pawelczyk M, et al. (2009) Candidate gene association study for noise-induced hearing loss in two independent noise-exposed populations. *Ann Hum Genet* 73: 215–224.
11. Konings A, Van Laer L, Michel S, Pawelczyk M, Carlsson PI, et al. (2009) Variations in *HSP70* genes associated with noise-induced hearing loss in two independent populations. *Eur J Hum Genet* 17: 329–335.
12. Yang M, Tan H, Yang Q, Wang F, Yao H, et al. (2006) Association of *hsp70* polymorphisms with risk of noise-induced hearing loss in Chinese automobile workers. *Cell Stress Chaperones* 11: 233–239.
13. Rabinowitz PM, Pierce Wise J Sr, Hur Mobo B, Antonucci PG, Powell C, et al. (2002) Antioxidant status and hearing function in noise-exposed workers. *Hear Res* 173: 164–171.
14. Fortunato G, Marciano E, Zarrilli F, Mazzaccara C, Intriери M, et al. (2004) Paraoxonase and superoxide dismutase gene polymorphisms and noise-induced hearing loss. *Clin Chem* 50: 2012–2018.
15. Konings A, Van Laer L, Pawelczyk M, Carlsson PI, Bondeson ML, et al. (2007) Association between variations in *CAT* and noise-induced hearing loss in two independent noise-exposed populations. *Hum Mol Genet* 16: 1872–1883.
16. Shen H, Huo X, Liu K, Li X, Gong W, et al. (2012) Genetic variation in *GSTM1* is associated with susceptibility to noise-induced hearing loss in a Chinese population. *J Occup Environ Med* 54: 1157–1162.
17. Li XT, Li X, Hu FF, Shen HX, Cao JL, et al. (2013) Association between Paraoxonase 2 Gene Polymorphisms and Noise-induced Hearing Loss in the Chinese Population. *J Occup Health* 55: 56–65.
18. Henderson D, Bielefeld EC, Harris KC, Hu BH (2006) The role of oxidative stress in noise-induced hearing loss. *Ear Hear* 27: 1–19.
19. Christmann M, Tomacic MT, Roos WP, Kaina B (2003) Mechanisms of human DNA repair: an update. *Toxicology* 193: 3–34.
20. Dahle J, Brunborg G, Svendsrud DH, Stokke T, Kvam E (2008) Overexpression of human *OGG1* in mammalian cells decreases ultraviolet A induced mutagenesis. *Cancer Lett* 267: 18–25.
21. Hung RJ, Hall J, Brennan P, Boffetta P (2005) Genetic polymorphisms in the base excision repair pathway and cancer risk: a HuGE review. *Am J Epidemiol* 162: 925–942.

22. Totonchy MB, Tamura D, Pantell MS, Zalewski C, Bradford PT, et al. (2013) Auditory analysis of xeroderma pigmentosum 1971–2012: hearing function, sun sensitivity and DNA repair predict neurological degeneration. *Brain* 136: 194–208.
23. Cheng KC, Cahill DS, Kasai H, Nishimura S, Loeb LA (1992) 8-Hydroxyguanine, an abundant form of oxidative DNA damage, causes G→T and A→C substitutions. *J Biol Chem* 267: 166–172.
24. Hill JW, Evans MK (2006) Dimerization and opposite base-dependent catalytic impairment of polymorphic S326C OGG1 glycosylase. *Nucleic Acids Res* 34: 1620–1632.
25. Yamane A, Kohno T, Ito K, Sunaga N, Aoki K, et al. (2004) Differential ability of polymorphic OGG1 proteins to suppress mutagenesis induced by 8-hydroxyguanine in human cell in vivo. *Carcinogenesis* 25: 1689–1694.
26. Collins AR, Gaivao I (2007) DNA base excision repair as a biomarker in molecular epidemiology studies. *Mol Aspects Med* 28: 307–322.
27. Kim JI, Park YJ, Kim KH, Song BJ, Lee MS, et al. (2003) hOGG1 Ser326Cys polymorphism modifies the significance of the environmental risk factor for colon cancer. *World J Gastroenterol* 9: 956–960.
28. Okasaka T, Matsuo K, Suzuki T, Ito H, Hosono S, et al. (2009) hOGG1 Ser326Cys polymorphism and risk of lung cancer by histological type. *J Hum Genet* 54: 739–745.
29. Jiao X, Huang J, Wu S, Lv M, Hu Y, et al. (2007) hOGG1 Ser326Cys polymorphism and susceptibility to gallbladder cancer in a Chinese population. *Int J Cancer* 121: 501–505.
30. Li Q, Huang L, Rong L, Xue Y, Lu Q, et al. (2011) hOGG1 Ser326Cys polymorphism and risk of childhood acute lymphoblastic leukemia in a Chinese population. *Cancer Sci* 102: 1123–1127.
31. Xing DY, Tan W, Song N, Lin DX (2001) Ser326Cys polymorphism in hOGG1 gene and risk of esophageal cancer in a Chinese population. *Int J Cancer* 95: 140–143.
32. Xu J, Zheng SL, Turner A, Isaacs SD, Wiley KE, et al. (2002) Associations between hOGG1 sequence variants and prostate cancer susceptibility. *Cancer Res* 62: 2253–2257.
33. Bravard A, Vacher M, Moritz E, Vaslin L, Hall J, et al. (2009) Oxidation status of human OGG1-S326C polymorphic variant determines cellular DNA repair capacity. *Cancer Res* 69: 3642–3649.
34. Kohno T, Shimura K, Tosaka M, Tani M, Kim SR, et al. (1998) Genetic polymorphisms and alternative splicing of the hOGG1 gene, that is involved in the repair of 8-hydroxyguanine in damaged DNA. *Oncogene* 16: 3219–3225.
35. Goukassian D, Gad F, Yaar M, Eller MS, Nehal US, et al. (2000) Mechanisms and implications of the age-associated decrease in DNA repair capacity. *FASEB J* 14: 1325–1334.
36. Jacono AA, Hu B, Kopke RD, Henderson D, Van De Water TR, et al. (1998) Changes in cochlear antioxidant enzyme activity after sound conditioning and noise exposure in the chinchilla. *Hear Res* 117: 31–38.
37. Peng T, Shen HM, Liu ZM, Yan LN, Peng MH, et al. (2003) Oxidative DNA damage in peripheral leukocytes and its association with expression and polymorphisms of hOGG1: a study of adolescents in a high risk region for hepatocellular carcinoma in China. *World J Gastroenterol* 9: 2186–2193.
38. Palmer KT, Griffin MJ, Syddall HE, Coggon D (2004) Cigarette smoking, occupational exposure to noise, and self reported hearing difficulties. *Occup Environ Med* 61: 340–344.
39. Mizoue T, Miyamoto T, Shimizu T (2003) Combined effect of smoking and occupational exposure to noise on hearing loss in steel factory workers. *Occup Environ Med* 60: 56–59.
40. Karlsmose B, Lauritzen T, Engberg M, Parving A (2000) A five-year longitudinal study of hearing in a Danish rural population aged 31–50 years. *Br J Audiol* 34: 47–55.
41. Itoh A, Nakashima T, Arao H, Wakai K, Tamakoshi A, et al. (2001) Smoking and drinking habits as risk factors for hearing loss in the elderly: epidemiological study of subjects undergoing routine health checks in Aichi, Japan. *Public Health* 115: 192–196.
42. Nakamura M, Aoki N, Nakashima T, Hoshino T, Yokoyama T, et al. (2001) Smoking, alcohol, sleep and risk of idiopathic sudden deafness: a case-control study using pooled controls. *J Epidemiol* 11: 81–86.
43. Popelka MM, Cruickshanks KJ, Wiley TL, Tweed TS, Klein BE, et al. (2000) Moderate alcohol consumption and hearing loss: a protective effect. *J Am Geriatr Soc* 48: 1273–1278.
44. Curhan SG, Eavey R, Shargorodsky J, Curhan GC (2011) Prospective study of alcohol use and hearing loss in men. *Ear Hear* 32: 46–52.
